# Supplementary material for: Efficacy and Safety of Combination Therapy with Low-Dose Rivaroxaban in Patients with Cardiovascular Disease: A Systematic Review and Meta-Analysis of Randomized Controlled Trials
Source: MDPI journal article supplement (doi:10.3390/jcm13072033), 2024-03-31

**Efficacy and safety of combination therapy with low dose rivaroxaban in patients with cardiovascular disease: a systematic review and meta-analysis of randomized controlled trials**

Tommaso Bucci, Francesco Del Sole, Danilo Menichelli, Gioacchino Galardo, Flavio Giuseppe Biccirè,  
Alessio Farcomeni, Gregory Y.H. Lip, Pasquale Pignatelli, Daniele Pastori

Supplementary materials

**Supplementary Table S1.** Literature online search strategies.

| Database       | Search strategy                                                                       |
|----------------|---------------------------------------------------------------------------------------|
| PubMed         | ‘rivaroxaban’ AND ‘coronary artery disease’ OR ‘peripheral artery disease’            |
| Embase         | ' rivaroxaban' /exp AND ‘coronary artery disease’ OR ‘peripheral artery disease’ /exp |
| Web of Science | ALL= rivaroxaban ' AND ALL= ‘coronary artery disease’ OR ‘peripheral artery disease’  |

Supplementary Figure S1. Funnel plots for safety endpoints.

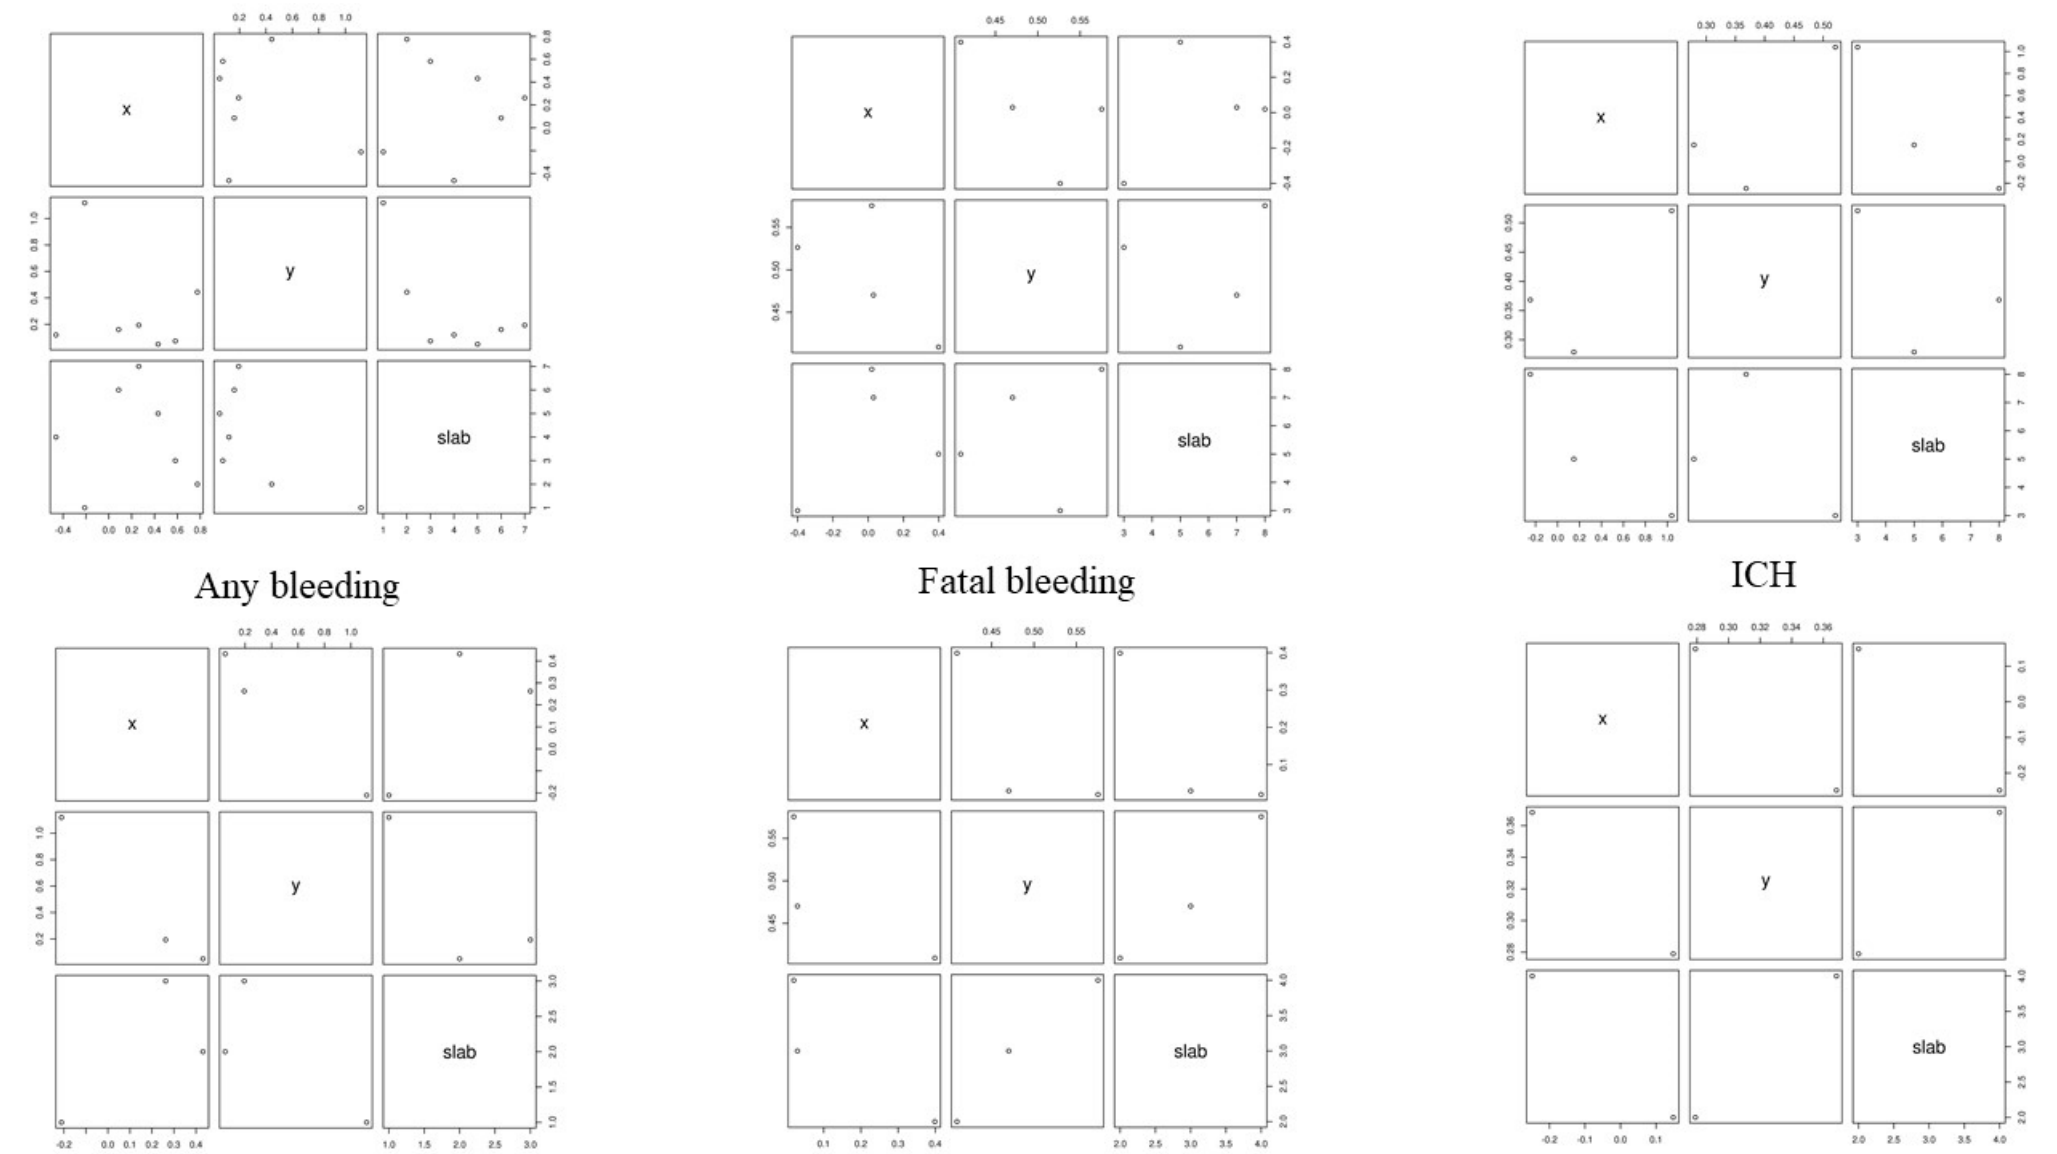

Supplementary Figure S2. Funnel plots for efficacy endpoints.

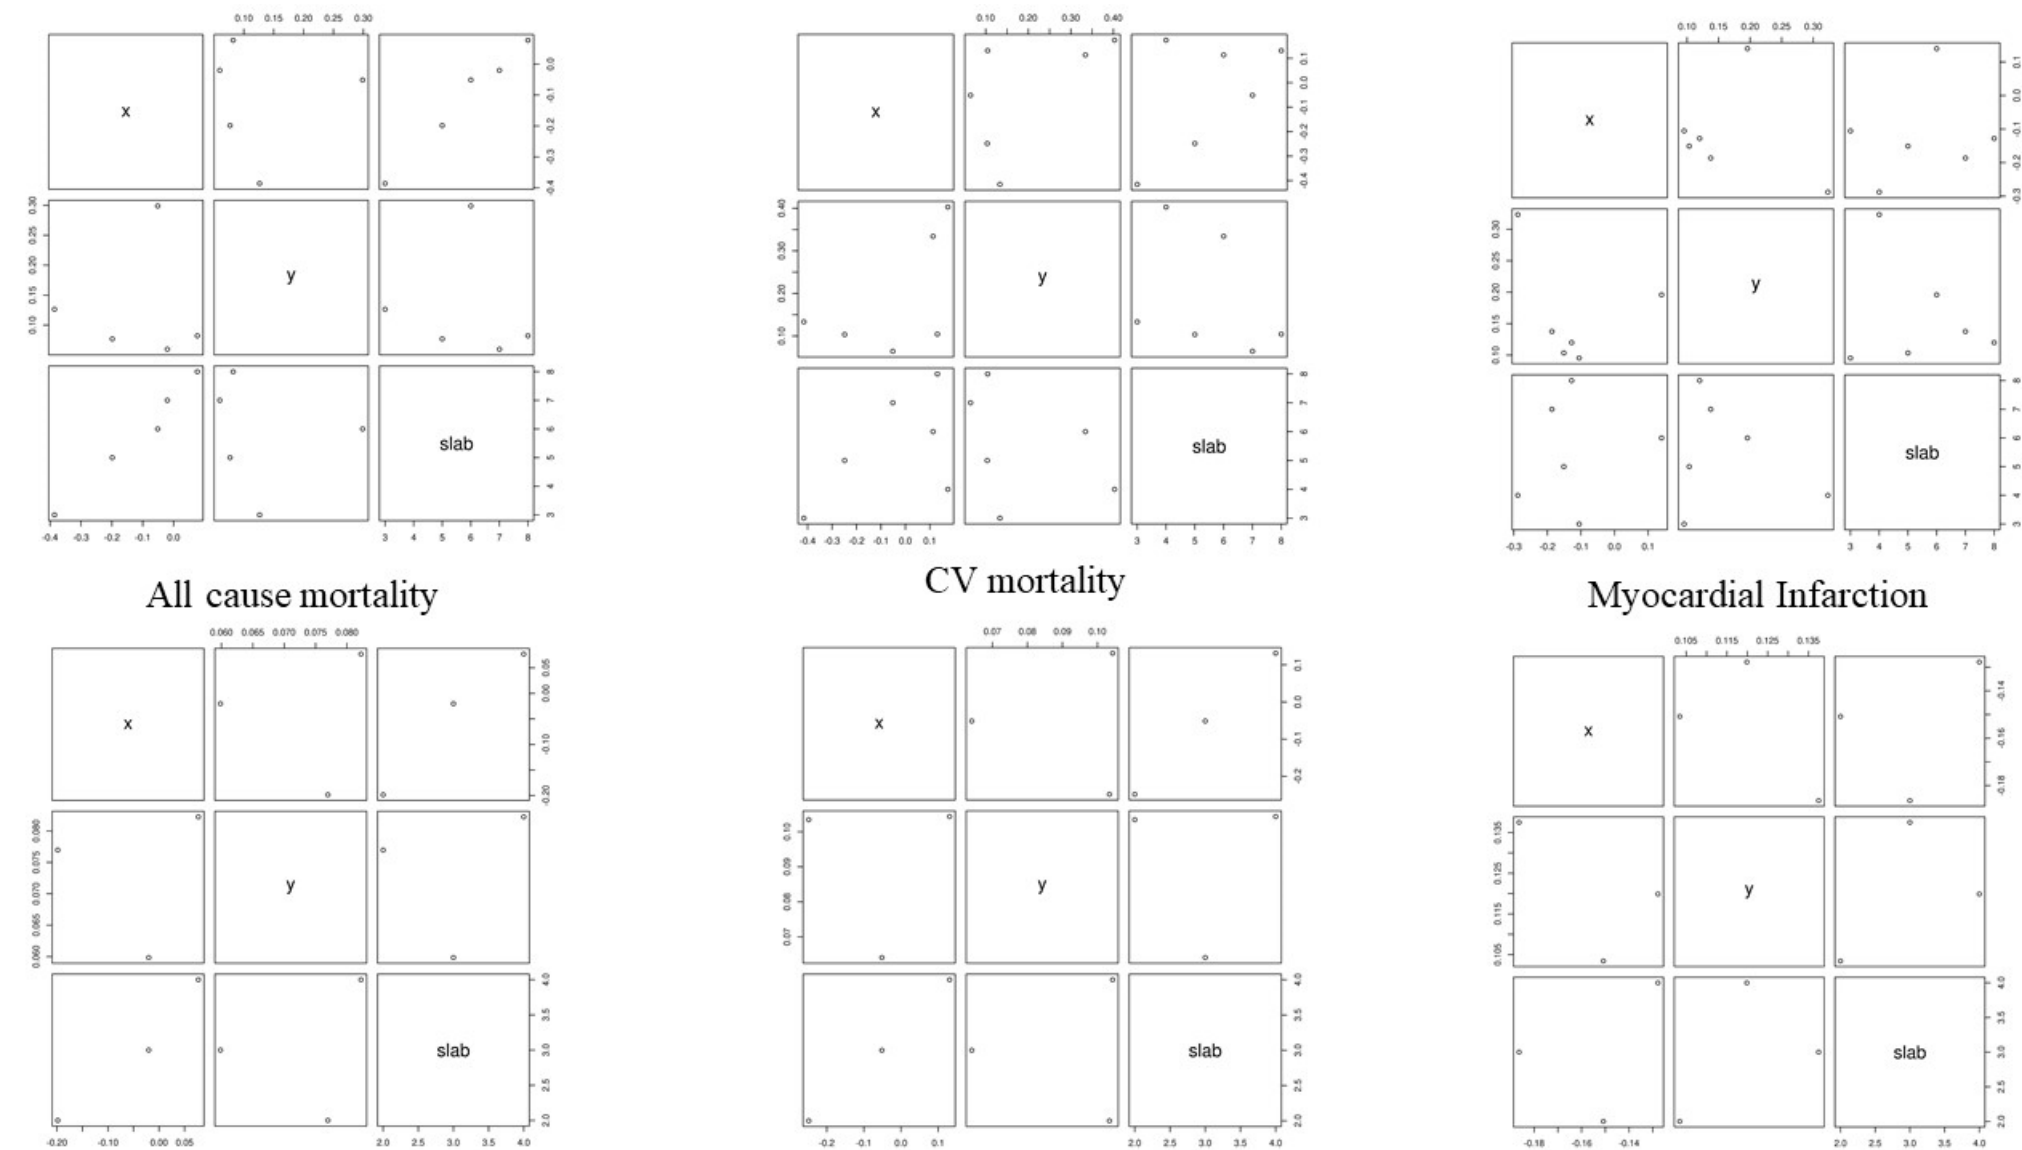

**Supplementary Figure S3. Efficacy endpoints in patients with coronary artery disease.**

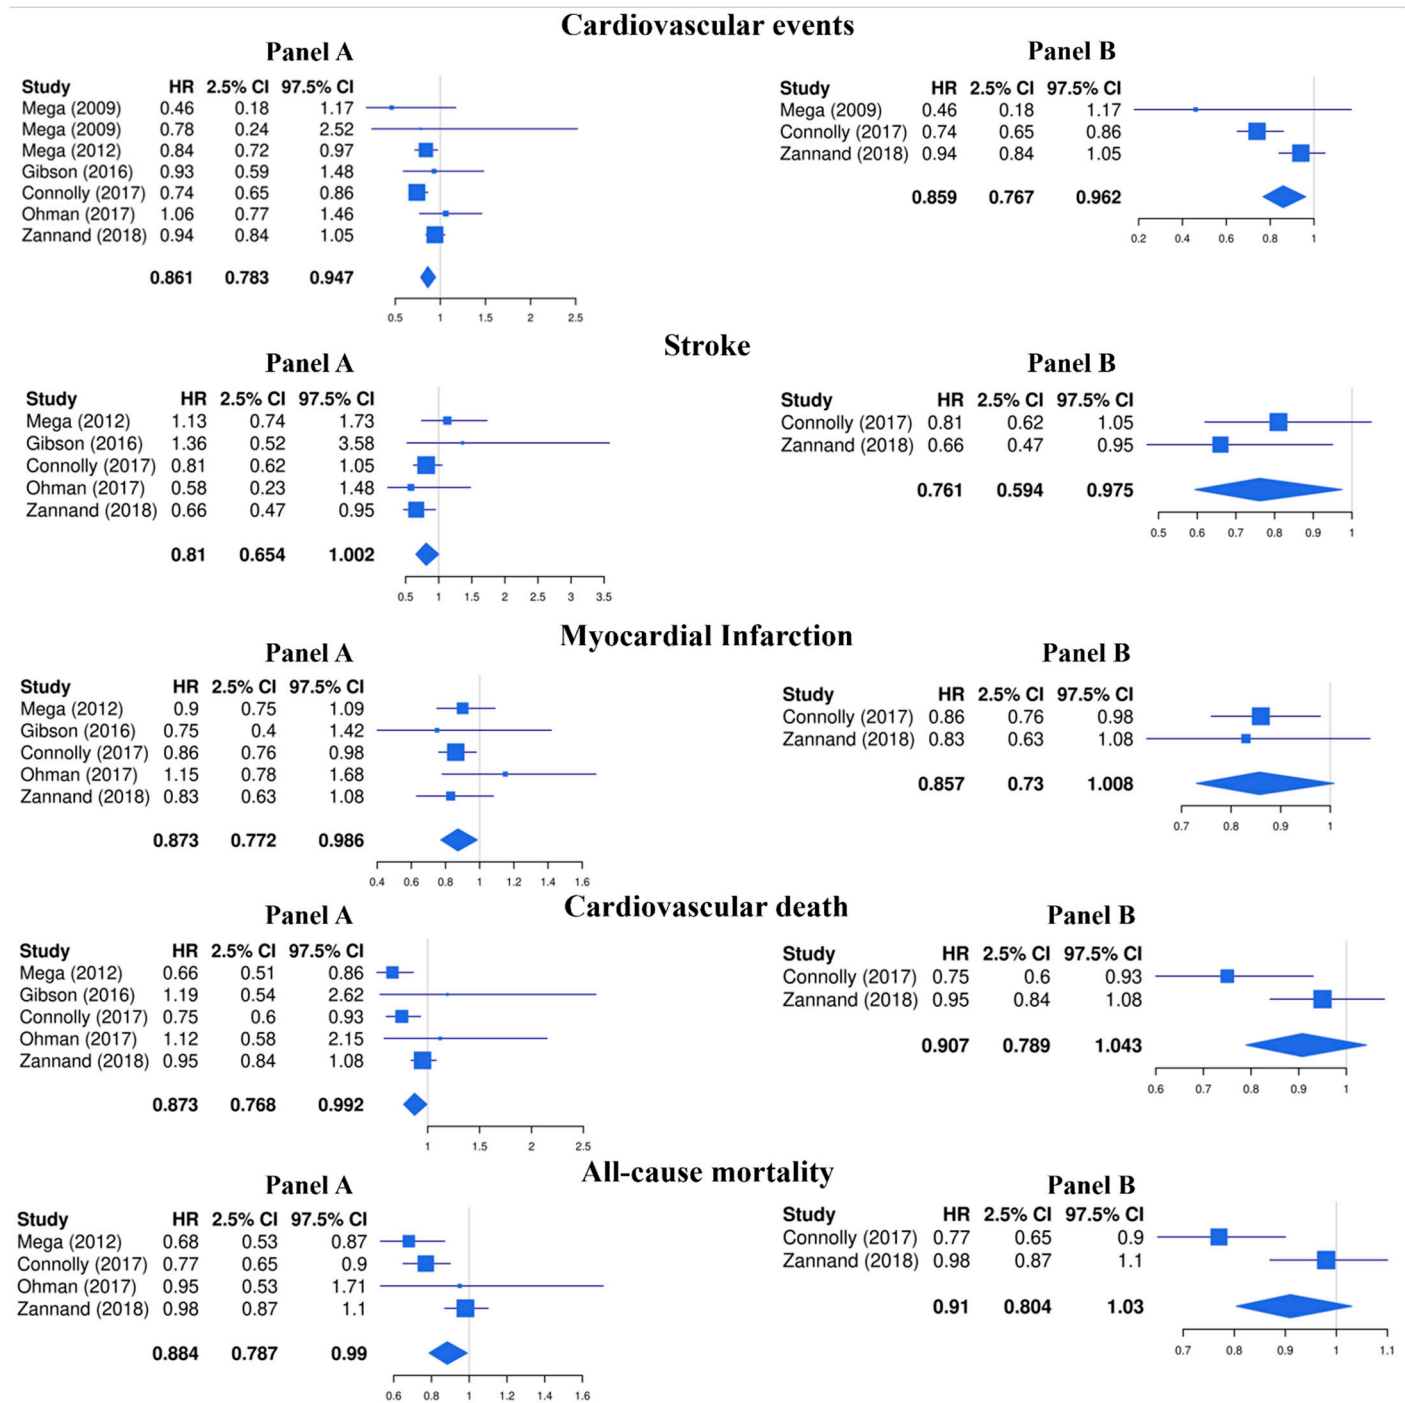

**Supplementary Figure S4. Safety endpoints in patients with coronary artery disease.**

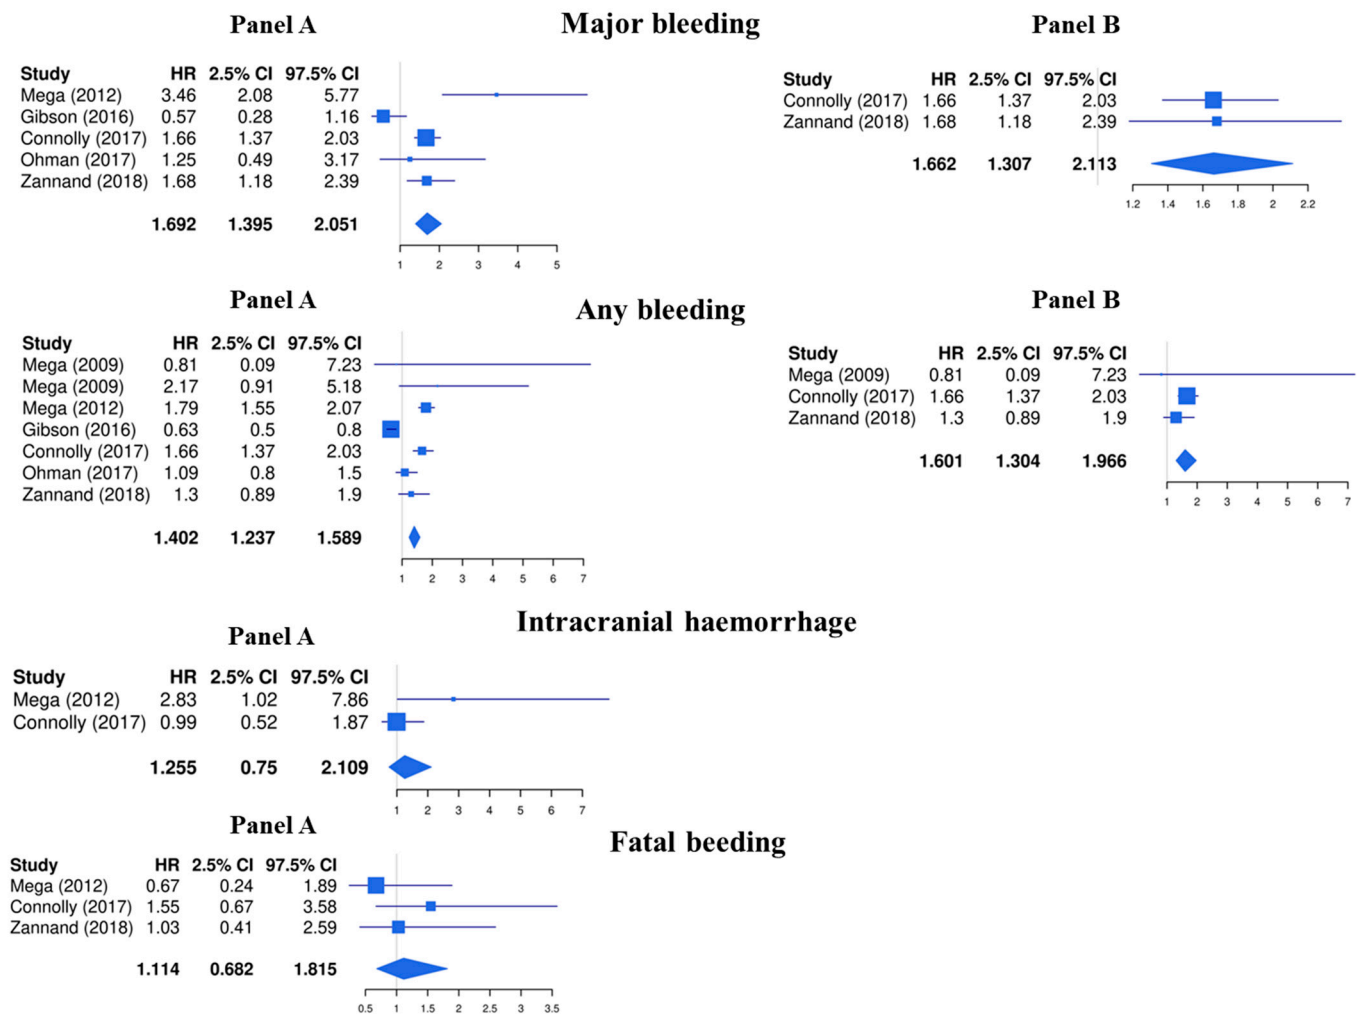

**Supplementary Figure S5. Safety and efficacy endpoints in patients with peripheral artery disease.**

### Cardiovascular events

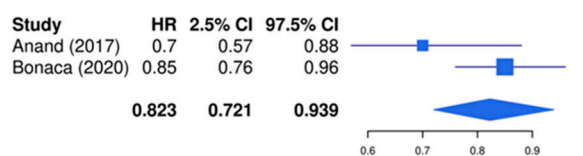

### Cardiovascular death

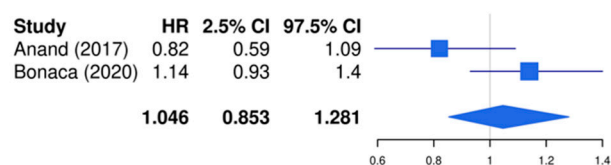

### Stroke

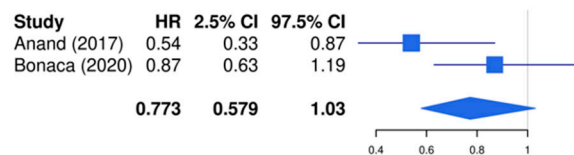

### All-cause mortality

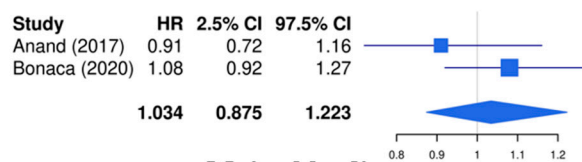

### Myocardial Infarction

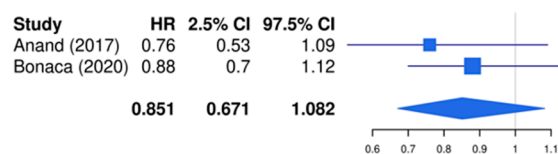

### Major bleeding

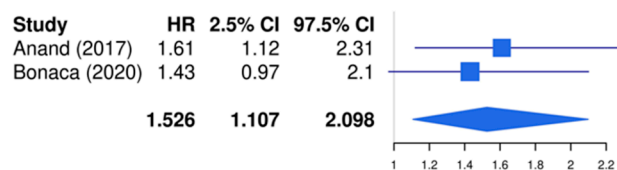

Supplement: s1 [file s1]
